# Supplementary material
Source: PubMed Central journal article supplement (PMC2926666)
Supplement: NIHMS226243-supplement-SUPPLEMENTARY_FIGURES.pdf [file NIHMS226243-supplement-SUPPLEMENTARY_FIGURES.pdf]

## Supplemental Figure Legends

**Supplemental Figure 1.** Treg number does not differ between B6, B6/*Ipr*, IL-23R<sup>-/-</sup>B6 and IL-23R<sup>-/-</sup>B6/*Ipr*. The different mouse strains were sacrificed and the splenocytes were extracted and stained for CD4, CD25, and Foxp3 (E-Biosciences Treg staining kit). Here we show one representative out of four independent experiments.

**Supplemental Figure 2.** Lymphocyte subsets do not differ between B6 and IL-23R<sup>-/-</sup>B6 mice. B6 and IL-23R<sup>-/-</sup>B6 (n=4 for each group) mice were sacrificed and the lymph node cells were extracted and stained for CD3, CD4, CD8. One representative experiment is shown here.

**Supplemental Figure 3.** Lymphocyte subtypes do not differ between B6 and IL-23R<sup>-/-</sup>B6 mice. B6 and IL-23R<sup>-/-</sup>B6 (n=4 for each group) mice were sacrificed and the lymph node cells were extracted and stained for CD3, CD4, CD8 and IL-17A (left panel) or IFN- $\gamma$  (right panel). One out of the four representative experiments is depicted here.

**Supplemental Figure 4.** Anti-IL-23 antibody treatment decreases the expression of IL-17A. 12-week old MRL/*Ipr* mice were injected with 20  $\mu$ gr of anti-IL-23R non-activating antibody (generous gift from BD biosciences) or control IgG intraperitoneally, three times a week for four weeks. At the end of the treatment the mice were sacrificed and the lymph node cells were extracted and stained for CD3, CD4, CD8 and IL-17A following the protocol for intracellular staining (Materials and Methods). The expression levels of IL-17A in T cells from 3 different mice per group are depicted here.

# Supplemental Fig. 1

Gate on CD4+

CD25 ↑  
FoXP3 →

**B6**

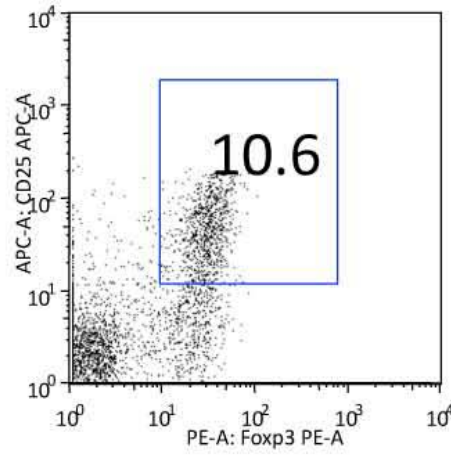

**IL-23R-/- B6**

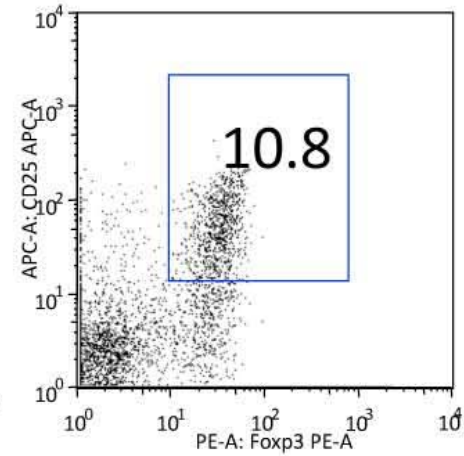

**B6/*lpr***

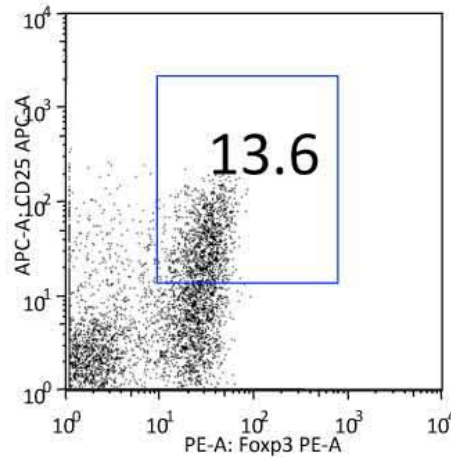

**IL-23R-/- B6/*lpr***

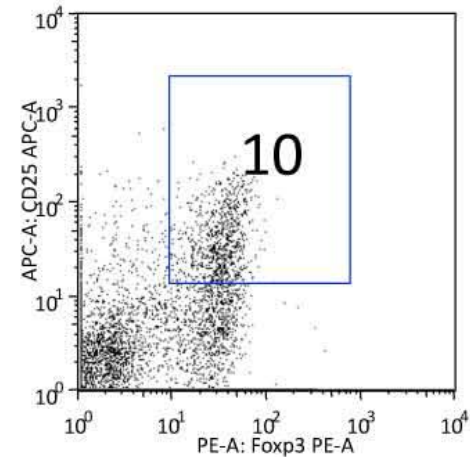

Supplemental  
Fig. 2

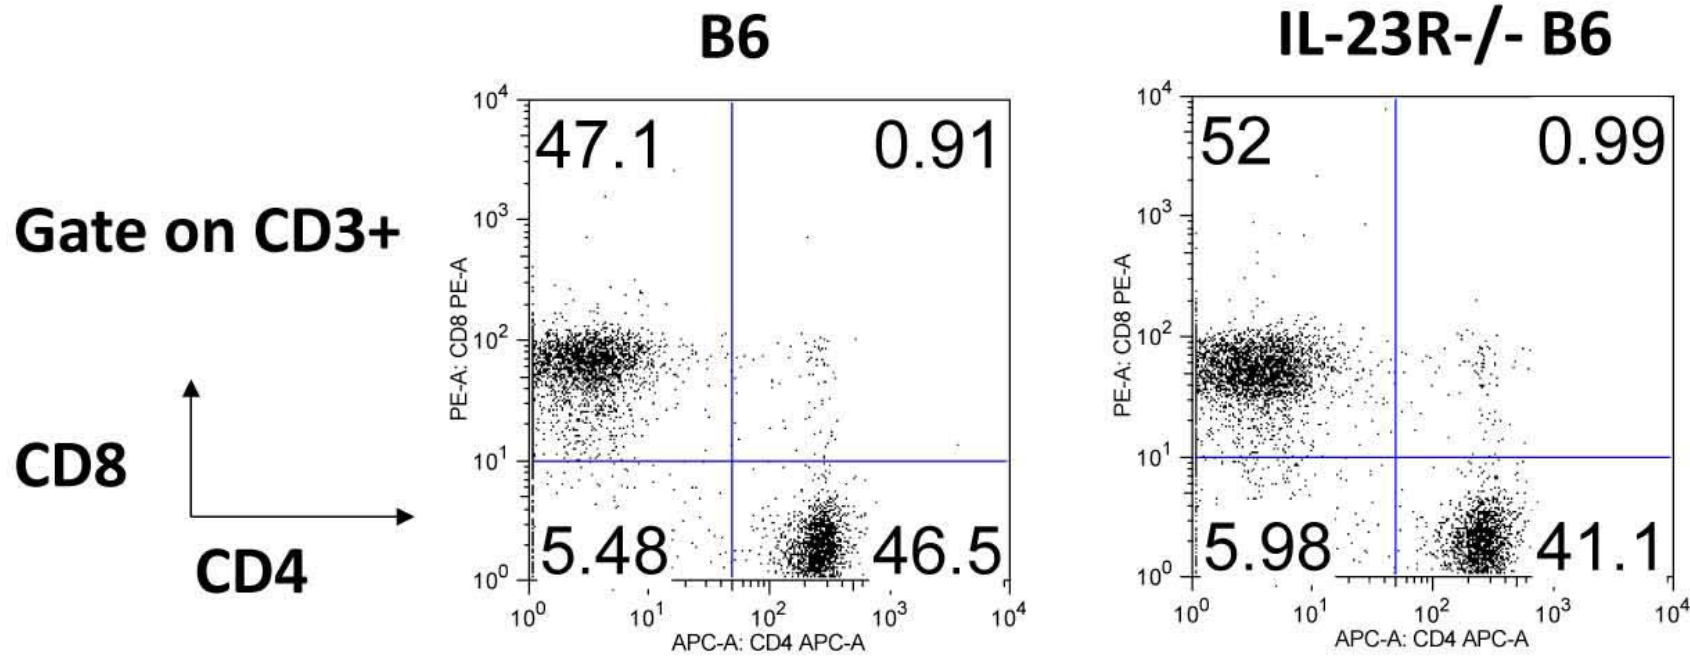

Supplemental  
Fig. 3

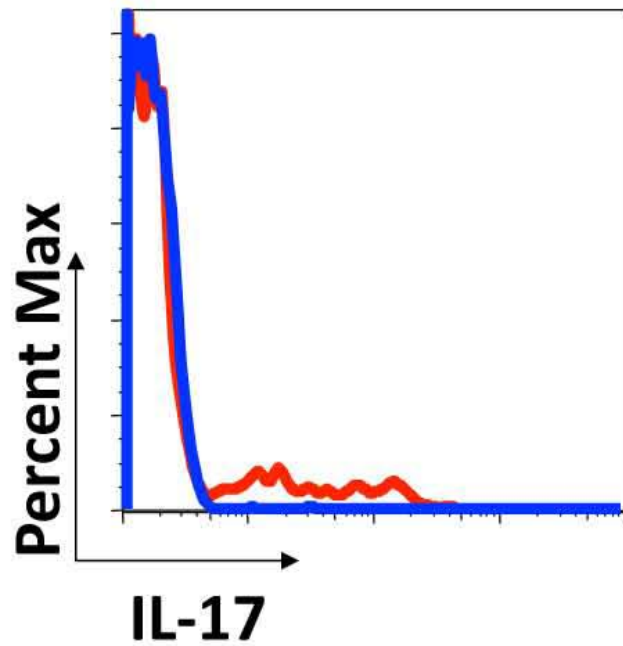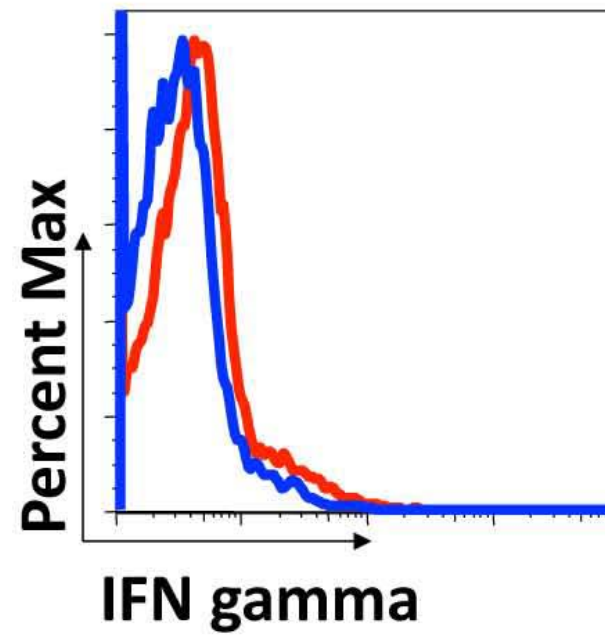

Gate on CD3+CD4-CD8-

— B6  
— IL-23R-/- B6

## Control IgG

## Anti-IL-23

CD4

DNT

CD4

DNT

Mouse 1

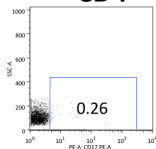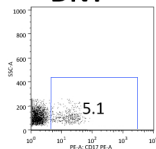

Mouse 4

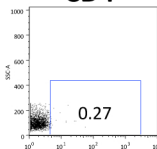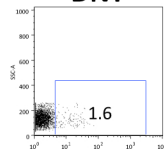

Mouse 2

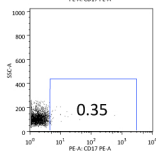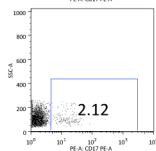

Mouse 5

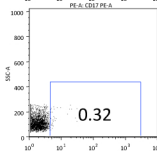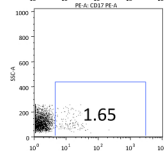

Mouse 3

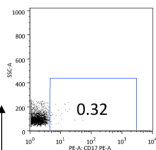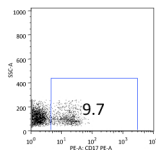

Mouse 6

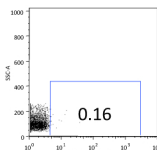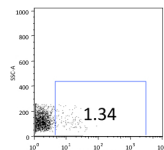

SSC

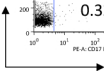

IL17
